# Supplementary material for: Fabrication and properties of Sn(iv) porphyrin-linked porous organic polymer for environmental applications
Source: Royal Society of Chemistry journal article supplement (doi:10.1039/d3ra04117d), 2023-01-01
Supplement: d3ra04117d1.pdf [file d3ra04117d1.pdf]

**Electronic Supplementary Information**

**Fabrication and Properties of Sn(IV)Porphyrin-Linked Porous Organic  
Polymer for Environmental Applications**

Chang-Ju Lee, Nirmal Kumar Shee, and Hee-Joon Kim\*

*Department of Chemistry and Bioscience, Kumoh National Institute of Technology, Gumi 39177,  
Republic of Korea. E-mail: hjk@kumoh.ac.kr*

**List of contents:**

**Fig. S1** TGA curves of **SnPOP**.

**Fig. S2** Photographs of **SnPOP** before and after swelling with dichloromethane (DCM).

**Fig. S3** FE-SEM images of **SnPOP** after treatment with 10 M NaOH solution (a), 10 M HCl solution (b), boiling water (c), and DMF (d).

**Fig. S4** FE-SEM images for as-prepared Ag nanoparticles on **SnPOP**.

**Fig. S5** Histogram of size distribution with an average diameter of  $47.2 \pm 12.7$  nm for Ag nanoparticles.

**Fig. S6** EDX spectroscopy display the purity and chemical composition of Ag nanoparticles.

**Table S1.** Comparison of BET surface area, and CO<sub>2</sub> uptake in reported porphyrin-based porous materials.

**Table S2.** Comparison of dye adsorption capacity in reported porphyrin-based porous materials.

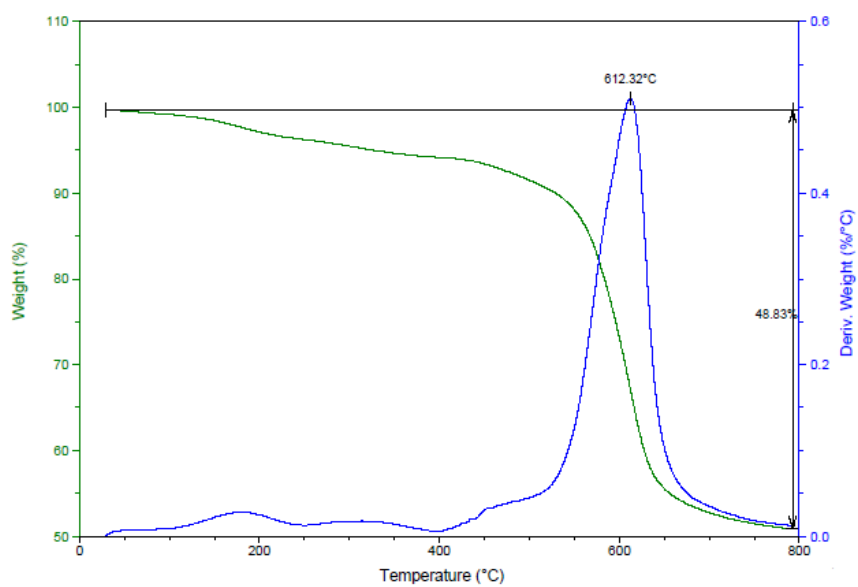

**Fig. S1** TGA curves of **SnPOP**.

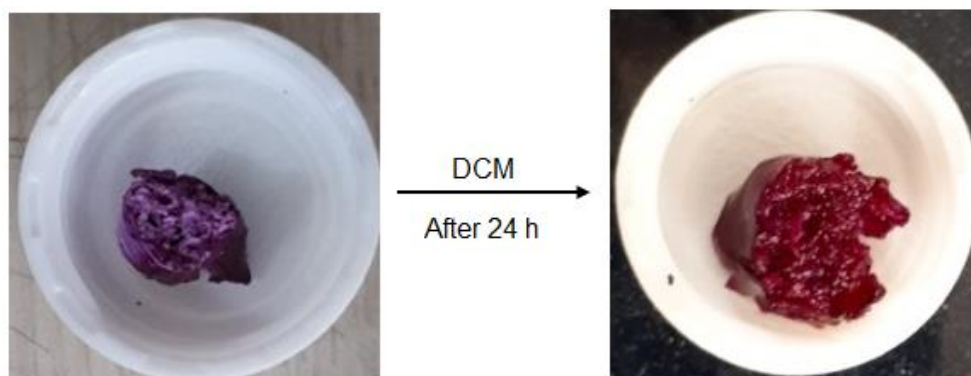

**Fig. S2** Photographs of **SnPOP** before and after swelling with dichloromethane (DCM).

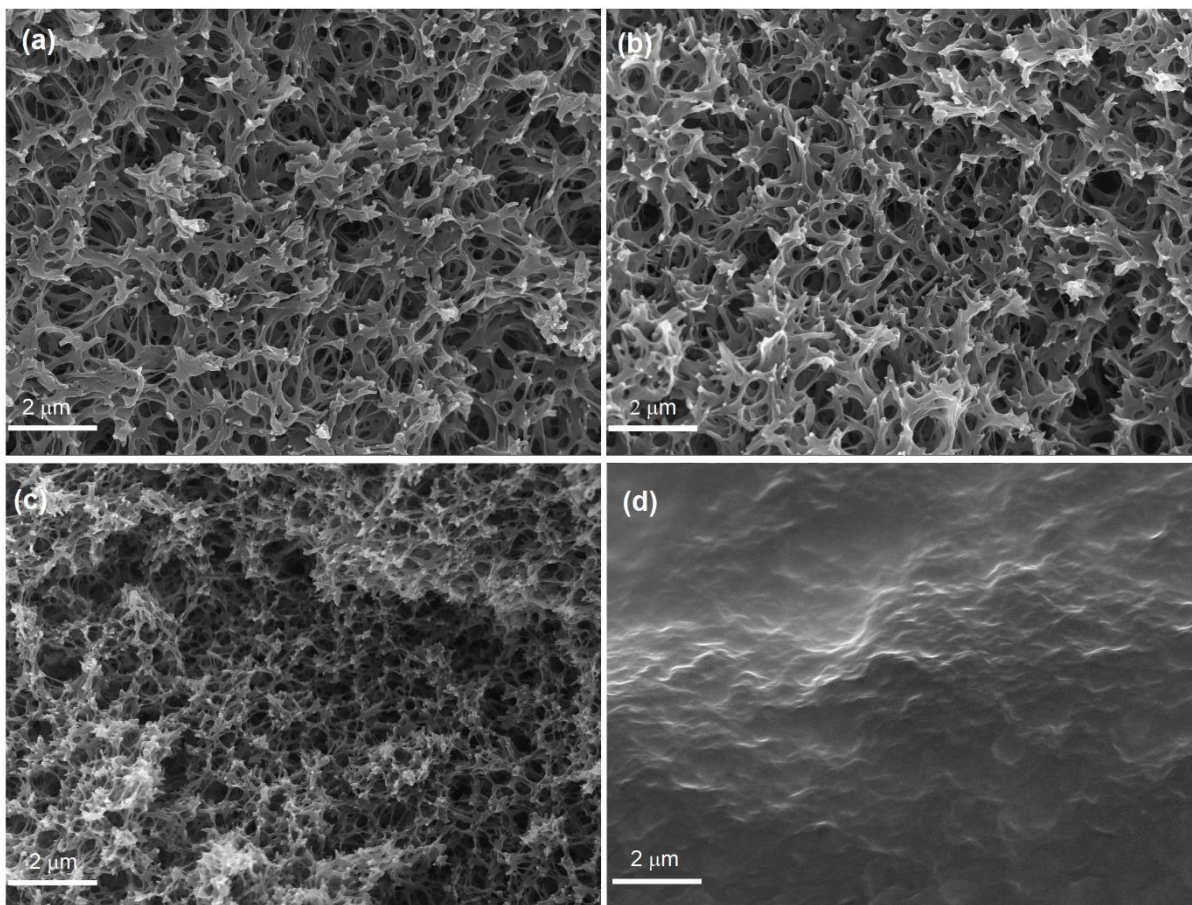

**Fig. S3** FE-SEM images of **SnPOP** after treatment with 10 M NaOH solution (a), 10 M HCl solution (b), boiling water (c), and DMF (d).

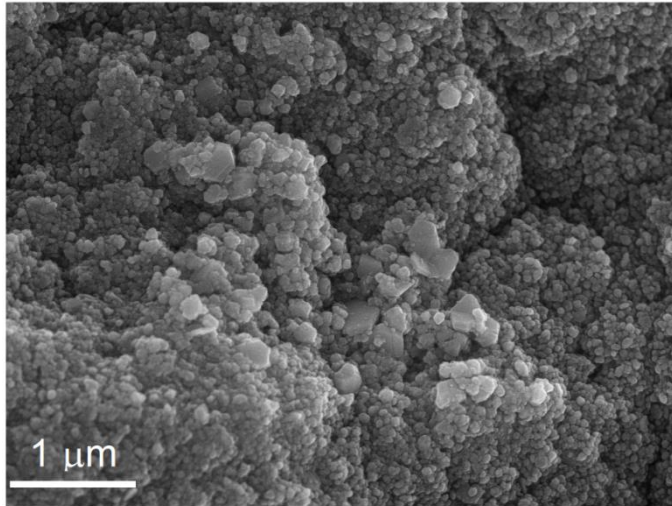

**Fig. S4** FE-SEM images for as-prepared Ag nanoparticles on SnPOP.

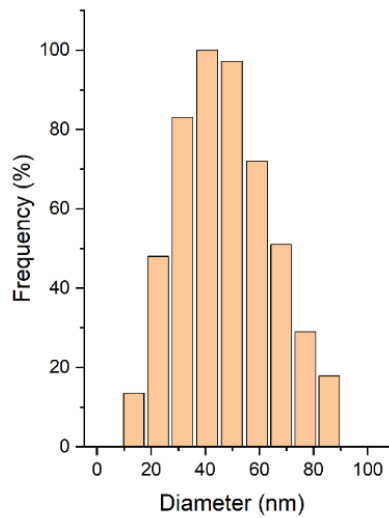

**Fig. S5** Histogram of size distribution with an average diameter of  $47.2 \pm 12.7$  nm for Ag nanoparticles.

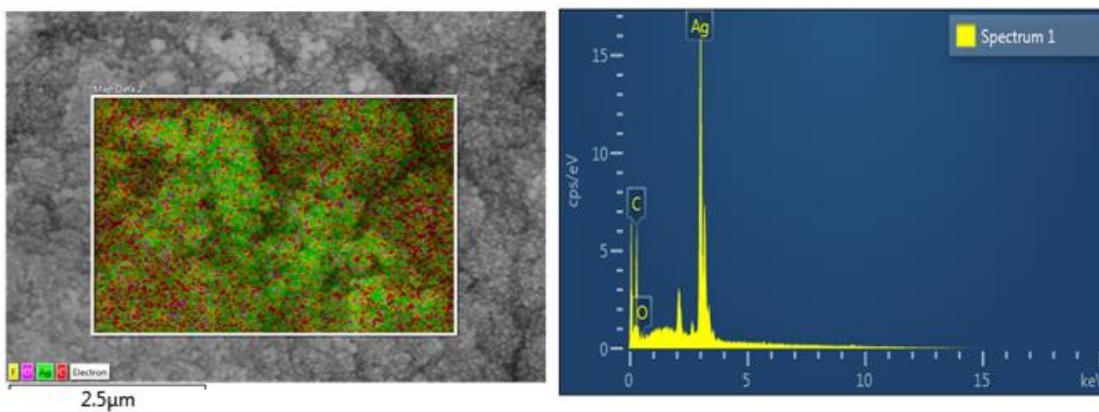

**Fig. S6** EDX spectroscopy display the purity and chemical composition of Ag nanoparticles.

**Table S1.** Comparison of BET surface area, and CO<sub>2</sub> uptake in reported porphyrin-based porous materials.

| <b>Adsorbent</b>                          | <b>BET surface area<br/>(m<sup>2</sup> g<sup>-1</sup>)</b> | <b>CO<sub>2</sub> uptake capacity<br/>(cm<sup>3</sup> g<sup>-1</sup>) at 273 K</b> | <b>References</b> |
|-------------------------------------------|------------------------------------------------------------|------------------------------------------------------------------------------------|-------------------|
| Ni-Por-4                                  | 778                                                        | 51                                                                                 | [1]               |
| POP-3                                     | 750                                                        | 46                                                                                 | [2]               |
| CuPor-BPDC                                | 442                                                        | 28                                                                                 | [3]               |
| MMPF-7                                    | 600                                                        | 55                                                                                 | [4]               |
| HOF-7a                                    | 124                                                        | 18                                                                                 | [5]               |
| [Et] <sub>100</sub> -H <sub>2</sub> PCOF  | 187                                                        | 21                                                                                 | [6]               |
| [HC≡C] <sub>50</sub> -H <sub>2</sub> PCOF | 962                                                        | 26                                                                                 | [6]               |
| Al-CMP                                    | 839                                                        | 22                                                                                 | [7]               |
| CoP-HOF                                   | 98                                                         | 42                                                                                 | [8]               |
| PBILP                                     | 557                                                        | 62                                                                                 | [9]               |
| PyP                                       | 428                                                        | 18                                                                                 | [10]              |
| MOPA2                                     | 420                                                        | 42                                                                                 | [11]              |
| Ru-BBT-POP                                | 655                                                        | 58                                                                                 | [12]              |
| HTM                                       | 5                                                          | 40                                                                                 | [13]              |
| HTM-MA                                    | 582                                                        | 94                                                                                 | [13]              |
| POP1-Fe                                   | 34                                                         | 28                                                                                 | [14]              |
| POP2-Fe                                   | 33                                                         | 30                                                                                 | [14]              |
| PP-Br-Zn-0.09                             | 12                                                         | 16                                                                                 | [15]              |
| ZFs-TCPP-Ni                               | 105                                                        | 11                                                                                 | [16]              |
| PCN-TCP                                   | 757                                                        | 64                                                                                 | [17]              |
| Co@PCN-TCP                                | 689                                                        | 70                                                                                 | [17]              |
| <b>SnPOP</b>                              | 227                                                        | 32                                                                                 | This work         |

**Table S2.** Comparison of dye adsorption capacity in reported porphyrin-based porous materials.

| Adsorbent                                                                                    | Dye | Adsorption capacity<br>(mg g <sup>-1</sup> ) | References |
|----------------------------------------------------------------------------------------------|-----|----------------------------------------------|------------|
| [Ca(HDCPP) <sub>2</sub> (H <sub>2</sub> O) <sub>2</sub> ] <sub>n</sub> (DMF) <sub>1.5n</sub> | MB  | 952                                          | [18]       |
| MOPA2                                                                                        | MB  | 315                                          | [11]       |
| PCN-222                                                                                      | MB  | 112                                          | [19]       |
| LIFM-WZ-3                                                                                    | MB  | 983                                          | [20]       |
| PCP1                                                                                         | MB  | 521                                          | [21]       |
| PPOPs-SO <sub>3</sub> H                                                                      | MB  | 980                                          | [22]       |
| 1.5 wt %-TPA                                                                                 | MB  | 191                                          | [23]       |
| Py-POP                                                                                       | MB  | 140                                          | [24]       |
| <b>SnPOP</b>                                                                                 | MB  | 187                                          | This work  |
| PCN-222                                                                                      | MO  | 128                                          | [19]       |
| 1.5 wt %-TPA                                                                                 | MO  | 16                                           | [23]       |
| PorphCat-Fe MOF                                                                              | MO  | 232                                          | [25]       |
| <b>SnPOP</b>                                                                                 | MO  | 175                                          | This work  |

## References

1. Z. Wang, S. Yuan, A. Mason, B. Reprogle, D.-J. Liu and L. Yu, Nanoporous porphyrin polymers for gas storage and separation, *Macromolecules*, 2012, **45**, 7413–7419.
2. A. Modak, M. Nandi, J. Mondal and A. Bhaumik, Porphyrin based porous organic polymers: Novel synthetic strategy and exceptionally high CO<sub>2</sub> adsorption capacity, *Chem. Commun.*, 2012, **48**, 248–250.
3. V. S. P. K. Neti, X. Wu, S. Deng and L. Echegoyen, Selective CO<sub>2</sub> capture in an imine linked porphyrin porous polymer, *Polym. Chem.*, 2013, **4**, 4566–4569.
4. W.-Y. Gao, Z. Zhang, L. Cash, L. Wojtas, Y.-S. Chen and S. Ma, Two rare indium-based porous metal–metalloporphyrin frameworks exhibiting interesting CO<sub>2</sub> uptake, *CrystEngComm*, 2013, **15**, 9320–9323.
5. W. Yang, B. Li, H. Wang, O. Alduhaish, K. Alfooty, M. A. Zayed, P. Li, H. D. Arman and B. Chen, A Microporous Porphyrin-Based Hydrogen-Bonded Organic Framework for Gas Separation, *Cryst. Growth Des.*, 2015, **15**, 2000–2004.
6. N. Huang, R. Krishna and D. Jiang, Tailor-Made Pore Surface Engineering in Covalent Organic Frameworks: Systematic Functionalization for Performance Screening, *J. Am. Chem. Soc.*, 2015, **137**, 7079–7082.
7. X.-F. Sheng, H.-C. Guo, Y.-S. Qin, X.-H. Wang and F.-S. Wang, A novel metalloporphyrin-based conjugated microporous polymer for capture and conversion of CO<sub>2</sub>, *RSC Adv.*, 2015, **5**, 31664–31669.
8. Z. Zhang, J. Li, Y. Yao and S. Sun, Permanently Porous Co(II) Porphyrin-Based Hydrogen Bonded Framework for Gas Adsorption and Catalysis, *Cryst. Growth Des.*, 2015, **15**, 5028–5033.
9. V. S. P. K. Neti, J. Wang, S. Deng and L. Echegoyen, Selective CO<sub>2</sub> Adsorption in a Porphyrin Polymer with Benzimidazole Linkages, *RSC Adv.*, 2015, **5**, 10960–10963.
10. V. S. P. K. Neti, J. Wang, S. Deng and L. Echegoyen, Synthesis of a Polyimide Porous Porphyrin Polymer for Selective CO<sub>2</sub> Capture, *J. Chem.*, 2015, **2015**, 1–7.
11. X. Zhao, L. Yuan, Z.-Q. Zhang, Y.-S. Wang, Q. Yu and J. Li, Synthetic Methodology for the Fabrication of Porous Porphyrin Materials with Metal–Organic–Polymer Aerogels, *Inorg. Chem.*, 2016, **55**, 5287–5296.
12. G. M. Eder, D. A. Pyles, E. R. Wolfson and P. L. McGrier, A ruthenium porphyrin-based porous organic polymer for the hydrosilylative reduction of CO<sub>2</sub> to formate, *Chem. Commun.*, 2019, **55**, 7195–7198.
13. G. Jiangfei, W. Lizhi, D. Zhang and J. Huang, Amino-Functionalized Porphyrin-Based Porous Organic Polymers for CO<sub>2</sub> Capture and Hg<sup>2+</sup> Removal, *Energy Fuels*, 2020, **34**, 9771–9778.



14. X. Yao, K. Chen, L. Q. Qiu, Z. W. Yang and L. N. He, Ferric Porphyrin-Based Porous Organic Polymers for CO<sub>2</sub> Photocatalytic Reduction to Syngas with Selectivity Control, *Chem. Mater.*, 2021, **33**, 8863–8872.
15. L. Liu, S. Jayakumar, J. Chen, L. Tao, H. Li, Q. Yang and C. Li, Synthesis of Bifunctional Porphyrin Polymers for Catalytic Conversion of Dilute CO<sub>2</sub> to Cyclic Carbonates, *ACS Appl. Mater. Interfaces*, 2021, **13**, 29522–29531.
16. S. Liang, X. Zhong, Z. Zhong, B. Han, W. Chen, K. Song, H. Deng and Z. Lin, Biomimetic inspired porphyrin-based nanoframes for highly efficient photocatalytic CO<sub>2</sub> reduction, *Chem. Eng. J.*, 2021, **411**, 128414.
17. G. Li, X. Zhou and Z. G. Wang, Construction of Hierarchical Porous Polycyanurate Networks with Cobaltoporphyrin for CO<sub>2</sub> Adsorption and Efficient Conversion to Cyclic Di- and Tri-Carbonates, *Macromolecules*, 2022, **55**, 4832–4840.
18. Y. Hou, J. Sun, D. Zhang, D. Qi and J. Jiang, Porphyrin-alkaline earth MOFs with the highest adsorption capacity for methylene blue, *Chem. Eur. J.*, 2016, **22**, 6345–6352.
19. H. Li, X. Cao, C. Zhang, Q. Yu, Z. Zhao, X. Niu, X. Sun, Y. Liu, L. Ma and Z. Li, Enhanced adsorptive removal of anionic and cationic dyes from single or mixed dye solutions using MOF PCN-222, *RSC Adv.*, 2017, **7**, 16273–16281.
20. Z. Wang, J.-H. Zhang, J.-J. Jiang, H. Wang, Z.-W. Wei, X. Zhu, M. Pan and C.-Y. Su, A Stable Metal Cluster-Metalloporphyrin MOF with High Capacity for Cationic Dye Removal, *J. Mater. Chem. A*, 2018, **6**, 17698–17705.
21. X. Xu, Q. Yu, D. Zhao, W. Zhang, N. Wang and J. Li, Synthesis and characterization of porphyrin-based porous coordination polymers obtained by supercritical CO<sub>2</sub> extraction, *J. Mater. Sci.*, 2018, **53**, 10534–11054.
22. T. Liu, L. Jing, L. Cui, Q. Liu and X. Zhang, Facile one-pot synthesis of a porphyrin based hydrophilic porous organic polymer and application as recyclable absorbent for selective separation of methylene blue, *Chemosphere*, 2018, **212**, 1038–1046.
23. Y. Keum, B. Kim, A. Byun and J. Park, Synthesis and Photocatalytic Properties of Titanium-Porphyrinic Aerogels, *Angew. Chem. Int. Ed.*, 2020, **59**, 21591–21596.
24. M. Li, H. Zhao and Z.-Y. Lu, Porphyrin-based porous organic polymer, Py-POP, as a multifunctional platform for efficient selective adsorption and photocatalytic degradation of cationic dyes, *Microporous Mesoporous Mater.*, 2020, **292**, 109774.
25. S. Daliran, M. Khajeh and A. R. Oveisi, A porous Fe-based porphyrinic metal–organic framework for highly effective removal of organic azo-dye, *Appl. Organomet. Chem.*, 2022, **36**, e6830.
